# Supplementary material for: Phenotypic and genetic dissection of component traits for early vigour in rice using plant growth modelling, sugar content analyses and association mapping
Source: PubMed Central journal article supplement (PMC4585419; doi:10.1093/jxb/erv258), 2015-05-28
Supplement: supp_erv258_jexbot142489_file001.pdf [file supp_erv258_jexbot142489_file001.pdf]

**Phenotypic and genetic dissection of component traits for early vigor in rice using plant growth modelling, sugar content analyses and association mapping**

Rebolledo M.C., Dingkuhn M, Courtois B, Gibon Y. Clément-Vidal A., Cruz D.F, Duitama J., Lorieux M. and Luquet D.

**Supplementary Figure legends:**

Fig. S1 : Histogram of distribution of other morphological variables and model parameters used for GWAS. Acronyms are explained in Table 2 of the manuscript.

Fig.S2 : Manhattan and Quantile – Quantile Plots for SUC, STA, SLAP, NSC, LLL, ICT, GLU, MGR, NBT and EPSIB. In the Manhattan plots the red line indicates the threshold for significant SNP association ( $P < 1.10^{-4}$ ) and the blue line indicates the threshold for suggestive SNP association ( $P < 5.10^{-4}$ ).

Fig. S3: Allele effects at markers associated with non-reported (A-C) and reported (D-G) genes. Phenotypic traits are described in Table 2 and QTL are described in Table 3.

**Table S1 : List of the 123 accessions: name, genetic group (Trjap: tropical japonica, Tejap: temperate japonica), agro-ecosystem (system: U=upland, RL=rain-fed lowland, I=irrigated) and type (T=traditional, I= improved, No available information (No Inf)).**

| Code | name                       | group | System | type | Code | name                         | group | System | type   |
|------|----------------------------|-------|--------|------|------|------------------------------|-------|--------|--------|
| 4    | AZUCENA                    | Trjap | U      | T    |      |                              |       |        |        |
| 7    | BULU PANDAK                | Trjap | RL     | T    | 353  | IRAT 364                     | Trjap | U      | I      |
| 13   | GIZA 171                   | Tejap | I      | I    | 354  | IRAT 366                     | Trjap | U      | I      |
| 14   | IAC 165                    | Trjap | U      | I    | 356  | JAO HAW                      | Trjap | U      | T      |
| 23   | NIPPONBARE                 | Tejap | I      | I    | 357  | JIMBRUK JOLOWORO             | Trjap | U      | T      |
| 250  | 62667                      | Trjap | U      | T    | 358  | JUMALI                       | Trjap | U      | T      |
| 252  | ARAGUAIA                   | Trjap | U      | I    | 360  | KAKANI 2                     | Trjap | U      | T      |
| 253  | ARIAS                      | Trjap | U      | T    | 361  | KANIRANGA                    | Trjap | U      | T      |
| 254  | ARROZ CEBADA               | Trjap | U      | T    | 362  | KARASUKARA<br>SURANKASU      | Trjap | U      | No Inf |
| 255  | BABER                      | Trjap | U      | T    | 363  | KEDAYAN                      | Trjap | U      | T      |
| 256  | BAGANAN<br>ASALAO          | Trjap | U      | T    | 365  | KENDINGA 5 H                 | Trjap | U      | T      |
| 257  | BAKUNG H                   | Trjap | U      | T    | 367  | KETAN KONIR                  | Trjap | RL     | T      |
| 259  | BENGALY<br>VAKARINA        | Trjap | U      | T    | 369  | KETAN MENAH                  | Trjap | U      | T      |
| 260  | BICO BRANCO                | Trjap | U      | T    | 371  | KHAO KAP XANG                | Trjap | U      | T      |
| 261  | BINULAWAN                  | Trjap | U      | T    | 372  | KINANDANG PATONG             | Trjap | U      | T      |
| 265  | CAAWA/FORTUNA<br>6         | Trjap | U      | I    | 373  | KOMOJAMANITRA                | Trjap | U      | T      |
| 268  | CANELA DE<br>FERRO         | Trjap | U      | T    | 374  | KU 115                       | Trjap | U      | I      |
| 269  | CHA LOY OE                 | Trjap | U      | T    | 375  | KUROKA                       | Tejap | I      | I      |
| 270  | CHA PHU MA                 | Trjap | U      | T    | 377  | LAMBAYQUE 1                  | Trjap | U      | T      |
| 273  | CICIH BETON                | Trjap | No Inf | T    | 379  | LUDAN                        | Trjap | U      | T      |
| 275  | CIRAD 358                  | Trjap | U      | I    | 381  | MAINTIMOLOTSY 1226           | Trjap | U      | T      |
| 276  | CIRAD 392                  | Trjap | U      | I    | 382  | MALAGKIT<br>PIRURUTONG       | Trjap | U      | T      |
| 277  | CIRAD 394                  | Trjap | U      | I    | 385  | MARAVILHA                    | Trjap | U      | I      |
| 279  | CIRAD 403                  | Trjap | U      | I    | 387  | MITSANGANAHJERY              | Trjap | U      | T      |
| 281  | CIRAD 488                  | Trjap | U      | I    | 388  | MOLOK                        | Trjap | RL     | T      |
| 282  | CNA-7\BO\1\1>33-<br>13-6-1 | Trjap | U      | I    | 389  | NABESHI                      | Trjap | No Inf | No Inf |
| 283  | COLOMBIA 1                 | Trjap | U      | I    | 390  | NEP HOA VANG                 | Trjap | U      | T      |
| 284  | CT13582-15-5-M             | Trjap | U      | I    | 391  | NHTA 10                      | Trjap | U      | T      |
| 291  | CURINCA                    | Trjap | U      | I    | 392  | NHTA 5                       | Trjap | U      | T      |
| 292  | DAM                        | Trjap | U      | T    | 397  | ORYZICA SABANA 6             | Trjap | U      | I      |
| 294  | DAVAO                      | Trjap | U      | T    | 398  | OS 4                         | Trjap | U      | T      |
| 296  | DINORADO                   | Trjap | U      | T    | 400  | P5589-1-1-3-P                | Trjap | U      | I      |
| 297  | DOURADO<br>AGULHA          | Trjap | U      | T    | 401  | PACHOLINHA                   | Trjap | U      | T      |
| 298  | DOURADO<br>PRECOCE         | Trjap | U      | T    | 404  | PADI KASALLE                 | Trjap | No Inf | T      |
| 301  | FOHISOMOTRA                | Trjap | U      | T    | 410  | PCT11\0\02,BO\1>55-1-3-<br>1 | Trjap | U      | I      |
| 303  | GANIGI                     | Trjap | U      | T    | 412  | PCT4\SA\4\1>1076-2-4-1-5     | Trjap | U      | I      |
| 304  | GEMJYA JYANAM              | Trjap | No Inf | T    | 413  | PEH PI NUO                   | Trjap | No Inf | T      |
| Code | name                       | group | System | type | Code | name                         | group | System | type   |

|     |                   |       |   |   |     |                         |       |    |        |
|-----|-------------------|-------|---|---|-----|-------------------------|-------|----|--------|
| 305 | GOGO              | Trjap | U | T | 417 | RATHAL                  | Trjap | U  | T      |
| 306 | GOGO LEMPUK       | Trjap | U | T | 418 | REKET MAUN              | Trjap | RL | T      |
| 307 | GOGO LEMPAK       | Trjap | U | T | 419 | RT 1031-69              | Trjap | U  | T      |
| 308 | GOMPA 2           | Trjap | U | T | 422 | SENG                    | Trjap | U  | T      |
| 310 | GRAZI             | Trjap | U | T | 428 | TREMBESE                | Trjap | U  | T      |
| 311 | GUARANI           | Trjap | U | I | 429 | TRES MESES              | Trjap | U  | T      |
| 312 | GUNDIL KUNING     | Trjap | U | T | 430 | TSIPALA 89              | Trjap | U  | T      |
| 319 | IAC 25            | Trjap | U | I | 432 | VARY LAVA 90            | Trjap | U  | T      |
| 321 | IDSA 77           | Trjap | U | I | 433 | VARY LAVA DE            | Trjap | U  | T      |
| 322 | IGUAPE CATETO     | Trjap | U | T | 437 | BETAFO<br>VARY SOMOTRA  | Trjap | U  | T      |
| 325 | IR60080-46A       | Trjap | U | I | 438 | SIHANAKA<br>WAB 56-125  | Trjap | U  | I      |
| 327 | IR63380-08        | Trjap | U | I | 439 | WAB 56-50               | Trjap | U  | I      |
| 328 | IR63372-08        | Trjap | U | I | 440 | WAB706-3-4-K-KB-1       | Trjap | U  | I      |
| 331 | IR65907-188-1-B   | Trjap | U | I | 443 | YANCAOUSSA              | Trjap | U  | T      |
| 334 | IR68704-145-1-1-B | Trjap | U | I | 445 | YUNLU 7                 | Trjap | U  | I      |
| 336 | IR71525-19-1-1    | Trjap | U | I | 446 | IR47686-09-01-B-1       | Trjap | U  | I      |
| 340 | IRAT 109          | Trjap | U | I | 447 | IR53236-275-1           | Trjap | U  | I      |
| 341 | IRAT 112          | Trjap | U | I | 449 | IR65261-19-1-B          | Trjap | U  | I      |
| 343 | IRAT 144          | Trjap | U | I | 452 | IR65907-206-4-B         | Trjap | U  | I      |
| 344 | IRAT 170          | Trjap | U | I | 454 | IR71524-44-1-1          | Trjap | U  | I      |
| 345 | IRAT 177          | Trjap | U | I | 457 | VIETNAM3                | Trjap | U  | T      |
| 348 | IRAT 216          | Trjap | U | I | 458 | IR47684-05-1-B          | Trjap | U  | I      |
| 349 | IRAT 234          | Trjap | U | I | 459 | PRIMAVERA               | Trjap | U  | I      |
| 350 | IRAT 257          | Trjap | U | I | 749 | CHUAN 3                 | Trjap | U  | No Inf |
| 352 | IRAT 362          | Trjap | U | I | 999 | EARLY MUTANT IAC<br>165 | Trjap | U  | I      |

**Table S2: correlation matrix between morphological measurements, Ecomeristem model parameters and nonstructural carbohydrates in source leaves estimated for 123 genotypes of the japonica rice diversity panel. Acronyms are described in Table 2.**

| Variables      | NBT           | LLL           | NBL           | DR            | SDW           | RGR           | EPSIB         | MGR          | PLASTO       | SLAP          | ICT      | DEV_PLASTO_MGR | GLU           | FRU         | SUC          | STA          | NSC      |
|----------------|---------------|---------------|---------------|---------------|---------------|---------------|---------------|--------------|--------------|---------------|----------|----------------|---------------|-------------|--------------|--------------|----------|
| NBT            | <b>1</b>      |               |               |               |               |               |               |              |              |               |          |                |               |             |              |              |          |
| LLL            | -0.076        | <b>1</b>      |               |               |               |               |               |              |              |               |          |                |               |             |              |              |          |
| NBL            | <b>0.817</b>  | -0.079        | <b>1</b>      |               |               |               |               |              |              |               |          |                |               |             |              |              |          |
| DR             | <b>0.539</b>  | -0.217        | <b>0.667</b>  | <b>1</b>      |               |               |               |              |              |               |          |                |               |             |              |              |          |
| SDW            | <b>0.499</b>  | <b>0.463</b>  | <b>0.438</b>  | <b>0.287</b>  | <b>1</b>      |               |               |              |              |               |          |                |               |             |              |              |          |
| RGR            | <b>0.588</b>  | <b>0.266</b>  | <b>0.628</b>  | <b>0.653</b>  | <b>0.584</b>  | <b>1</b>      |               |              |              |               |          |                |               |             |              |              |          |
| EPSIB          | 0.081         | 0.01          | 0.037         | <b>0.239</b>  | 0.192         | 0.183         | <b>1</b>      |              |              |               |          |                |               |             |              |              |          |
| MGR            | -0.089        | <b>0.731</b>  | -0.077        | -0.152        | <b>0.339</b>  | <b>0.355</b>  | -0.089        | <b>1</b>     |              |               |          |                |               |             |              |              |          |
| PLASTO         | <b>-0.423</b> | 0.039         | <b>-0.515</b> | <b>-0.724</b> | <b>-0.29</b>  | <b>-0.607</b> | <b>-0.233</b> | <b>0.319</b> | <b>1</b>     |               |          |                |               |             |              |              |          |
| SLAP           | -0.024        | -0.185        | -0.181        | -0.088        | 0.126         | -0.193        | 0.031         | -0.078       | 0.204        | <b>1</b>      |          |                |               |             |              |              |          |
| ICT            | <b>-0.44</b>  | 0.047         | <b>-0.369</b> | -0.134        | <b>-0.38</b>  | <b>-0.242</b> | <b>0.461</b>  | -0.145       | -0.045       | <b>-0.312</b> | <b>1</b> |                |               |             |              |              |          |
| DEV_PLASTO_MGR | <b>-0.417</b> | <b>-0.232</b> | <b>-0.518</b> | <b>-0.709</b> | <b>-0.437</b> | <b>-0.778</b> | -0.215        | -0.043       | <b>0.933</b> | <b>0.248</b>  | 0.006    | <b>1</b>       |               |             |              |              |          |
| GLU            | -0.175        | 0.229         | -0.075        | -0.039        | 0.085         | 0.004         | -0.079        | 0.109        | -0.034       | -0.01         | 0.004    | -0.076         | <b>1</b>      |             |              |              |          |
| FRU            | -0.136        | <b>0.264</b>  | -0.051        | -0.053        | 0.133         | 0.045         | -0.083        | 0.12         | -0.059       | 0.023         | -0.063   | -0.109         | <b>0.88</b>   | <b>1</b>    |              |              |          |
| SUC            | 0.111         | 0.116         | 0.092         | <b>0.245</b>  | <b>0.242</b>  | 0.22          | -0.04         | 0.159        | -0.112       | 0.007         | -0.153   | -0.179         | <b>-0.258</b> | -0.139      | <b>1</b>     |              |          |
| STA            | -0.128        | 0.048         | -0.14         | -0.096        | 0.025         | 0.059         | -0.044        | 0.171        | 0.105        | 0.056         | -0.051   | 0.042          | 0.176         | 0.192       | <b>0.314</b> | <b>1</b>     |          |
| NSC            | -0.053        | 0.197         | -0.035        | 0.097         | 0.213         | 0.183         | -0.08         | <b>0.235</b> | -0.039       | 0.033         | -0.134   | -0.133         | <b>0.296</b>  | <b>0.37</b> | <b>0.734</b> | <b>0.777</b> | <b>1</b> |

**Table S3: Suggestive QTL detected at p-values <math>5.10^{-4}</math>.**

| Qtl name | Chr | SNP position | LD region         | Trait                     | MAF  | F     | p-value  | markerR2 | # of reported genes in 20kb |
|----------|-----|--------------|-------------------|---------------------------|------|-------|----------|----------|-----------------------------|
| 1        | 1   | 792359       | 792359-2813171    | DEV_PLASTO_MGR            | 0.28 | 15.59 | 1.36E-04 | 0.11     | 9                           |
| 2        | 1   | 859635       | 859635-937008     | NBT                       | 0.11 | 13.33 | 4.00E-04 | 0.10     | 7                           |
| 3        | 1   | 986764       |                   | GLU                       | 0.17 | 13.60 | 3.47E-04 | 0.09     | 8                           |
| 4        | 1   | 2280593      | 2280593-25077287  | ICT                       | 0.31 | 15.17 | 1.66E-04 | 0.11     | 4                           |
| 5        | 1   | 2456648      |                   | SDW                       | 0.26 | 14.42 | 2.38E-04 | 0.11     | 4                           |
| 6        | 1   | 2803218      |                   | PLASTO                    | 0.2  | 14.03 | 2.83E-04 | 0.09     | 9                           |
| 7        | 1   | 2813225      |                   | DEV_PLASTO_MGR and PLASTO | 0.28 | 16.03 | 1.11E-04 | 0.11     | 1                           |
| 8        | 1   | 2854835      |                   | DEV_PLASTO_MGR            | 0.22 | 15.75 | 1.26E-04 | 0.11     | 5                           |
| 9        | 1   | 2886293      |                   | DEV_PLASTO_MGR and PLASTO | 0.2  | 16.11 | 1.07E-04 | 0.11     | 7                           |
| 10       | 1   | 6360493      | 6360493-6360496   | FRU                       | 0.46 | 13.73 | 3.25E-04 | 0.09     | 7                           |
| 11       | 1   | 23882306     | 23882306-23922001 | PLASTO                    | 0.38 | 13.27 | 4.05E-04 | 0.09     | 8                           |
| 12       | 1   | 28818609     | 28818609-28980468 | RGR                       | 0.11 | 14.75 | 2.01E-04 | 0.11     | 3                           |
| 13       | 1   | 28985793     |                   | RGR                       | 0.14 | 13.51 | 3.61E-04 | 0.10     | 5                           |
| 14       | 1   | 32139722     | 32139722-32133860 | NBT                       | 0.11 | 13.23 | 4.19E-04 | 0.10     | 6                           |
| 15       | 1   | 33336224     |                   | FRU                       | 0.4  | 15.74 | 1.27E-04 | 0.11     | 6                           |
| 16       | 1   | 34167105     |                   | LLL                       | 0.15 | 13.03 | 4.54E-04 | 0.09     | 8                           |
| 17       | 1   | 42138453     | 42138453-42169818 | RGR                       | 0.13 | 12.88 | 4.89E-04 | 0.10     | 4                           |
| 18       | 2   | 18637296     |                   | SDW                       | 0.27 | 13.11 | 4.43E-04 | 0.10     | 2                           |
| 19       | 2   | 18704391     |                   | RGR                       | 0.29 | 16.06 | 1.09E-04 | 0.11     | 4                           |
| 20       | 2   | 24494317     |                   | MGR                       | 0.25 | 14.78 | 1.98E-04 | 0.10     | 3                           |
| 21       | 2   | 25352210     |                   | MGR                       | 0.31 | 15.80 | 1.24E-04 | 0.11     | 4                           |
| 22       | 2   | 32101207     |                   | RGR                       | 0.07 | 15.57 | 1.37E-04 | 0.12     | 8                           |
| 23       | 2   | 33806279     |                   | NBL                       | 0.27 | 13.11 | 4.38E-04 | 0.10     | 9                           |
| 24       | 3   | 19005645     |                   | RGR                       | 0.06 | 13.26 | 4.08E-04 | 0.10     | 1                           |
| 25       | 3   | 32655537     | 32655537-32969116 | MGR                       | 0.07 | 12.87 | 4.92E-04 | 0.09     | 5                           |
| 26       | 4   | 11887993     |                   | NBL                       | 0.18 | 13.61 | 3.46E-04 | 0.10     | 3                           |
| 27       | 4   | 14511266     |                   | NBT                       | 0.07 | 13.41 | 3.85E-04 | 0.10     | 3                           |
| 28       | 4   | 28119554     |                   | SDW                       | 0.3  | 13.77 | 3.24E-04 | 0.10     | 7                           |
| 29       | 4   | 28121876     |                   | SDW                       | 0.29 | 16.05 | 1.12E-04 | 0.12     | 1                           |
| 30       | 5   | 1445349      |                   | NSC                       | 0.13 | 13.34 | 3.93E-04 | 0.09     | 4                           |
| 31       | 5   | 4080087      |                   | SDW                       | 0.33 | 14.18 | 2.66E-04 | 0.10     | 5                           |
| 32       | 5   | 5548160      |                   | NBL                       | 0.16 | 13.04 | 4.53E-04 | 0.10     | 2                           |
| 33       | 5   | 13713053     | 13713053-13748504 | NBT                       | 0.07 | 15.10 | 1.74E-04 | 0.11     | 4                           |
| 34       | 6   | 9661428      |                   | NBL                       | 0.37 | 13.89 | 3.02E-04 | 0.10     | 3                           |
| 35       | 6   | 9924240      |                   | NBL RGR                   | 0.36 | 14.26 | 2.54E-04 | 0.10     | 5                           |
| 36       | 6   | 21231994     |                   | SDW                       | 0.11 | 14.77 | 2.01E-04 | 0.11     | 5                           |
| 37       | 6   | 21338769     |                   | FRU                       | 0.06 | 14.06 | 2.79E-04 | 0.09     | 3                           |

| Qtl name | Chr | SNP position | LD region         | Trait          | MAF  | F     | p-value  | markerR2 | # of reported genes in 20kb |
|----------|-----|--------------|-------------------|----------------|------|-------|----------|----------|-----------------------------|
| 38       | 7   | 1500590      |                   | MGR            | 0.12 | 14.26 | 2.54E-04 | 0.10     | 4                           |
| 39       | 7   | 4334575      |                   | SLAP           | 0.17 | 13.02 | 4.57E-04 | 0.10     | 5                           |
| 40       | 7   | 4746733      |                   | EPSIB          | 0.37 | 14.01 | 2.86E-04 | 0.11     | 8                           |
| 41       | 7   | 18923835     | 18923835-19039440 | DR             | 0.28 | 13.65 | 3.39E-04 | 0.09     | 6                           |
| 42       | 7   | 19160805     |                   | DR             | 0.28 | 14.79 | 1.97E-04 | 0.10     | 1                           |
| 43       | 7   | 19386273     | 19386273-19397751 | DR             | 0.15 | 13.31 | 3.98E-04 | 0.09     | 5                           |
| 44       | 7   | 19475740     |                   | NBL            | 0.15 | 14.87 | 1.90E-04 | 0.11     | 3                           |
| 45       | 7   | 21628202     |                   | FRU            | 0.33 | 13.01 | 4.61E-04 | 0.09     | 6                           |
| 46       | 7   | 22559297     |                   | NSC and PLASTO | 0.22 | 13.10 | 4.40E-04 | 0.08     | 4                           |
| 47       | 8   | 18679124     |                   | NBL            | 0.07 | 13.23 | 4.14E-04 | 0.10     | 3                           |
| 48       | 9   | 678173       |                   | LLL            | 0.08 | 13.24 | 4.12E-04 | 0.09     | 3                           |
| 49       | 9   | 10393681     |                   | DR             | 0.11 | 14.86 | 1.91E-04 | 0.10     | 5                           |
| 50       | 9   | 14406563     | 14406563-14456284 | LLL            | 0.09 | 16.11 | 1.07E-04 | 0.10     | 6                           |
| 51       | 9   | 21275388     |                   | DEV_PLASTO_MGR | 0.11 | 12.80 | 5.08E-04 | 0.09     | 6                           |
| 52       | 10  | 11542583     |                   | EPSIB          | 0.11 | 14.87 | 1.90E-04 | 0.11     | 5                           |
| 53       | 10  | 15253191     |                   | GLU            | 0.07 | 14.10 | 2.74E-04 | 0.10     | 12                          |
| 54       | 10  | 18059128     | 18059128-18061638 | ICT            | 0.33 | 13.63 | 3.42E-04 | 0.10     | 2                           |
| 55       | 10  | 21779320     |                   | GLU            | 0.2  | 13.16 | 4.28E-04 | 0.10     | 5                           |
| 56       | 11  | 3161547      |                   | NBT            | 0.32 | 13.83 | 3.16E-04 | 0.10     | 6                           |
| 57       | 11  | 6671341      |                   | ICT            | 0.21 | 14.78 | 1.99E-04 | 0.11     | 4                           |
| 58       | 11  | 7693392      | 7693392-7693395   | GLU            | 0.09 | 13.05 | 4.52E-04 | 0.09     | 5                           |
| 59       | 11  | 22526446     |                   | SDW            | 0.24 | 13.86 | 3.11E-04 | 0.10     | 5                           |
| 60       | 11  | 23866023     |                   | EPSIB          | 0.42 | 14.49 | 2.28E-04 | 0.11     | 3                           |
| 61       | 11  | 26441049     |                   | EPSIB          | 0.09 | 13.42 | 3.78E-04 | 0.10     | 5                           |
| 62       | 11  | 27158519     | 27158519-27158522 | EPSIB          | 0.41 | 13.91 | 2.99E-04 | 0.11     | 6                           |
| 63       | 12  | 3643368      |                   | PLASTO         | 0.08 | 13.17 | 4.26E-04 | 0.10     | 7                           |
| 64       | 12  | 12393537     |                   | FRU            | 0.06 | 13.98 | 2.89E-04 | 0.10     | 2                           |

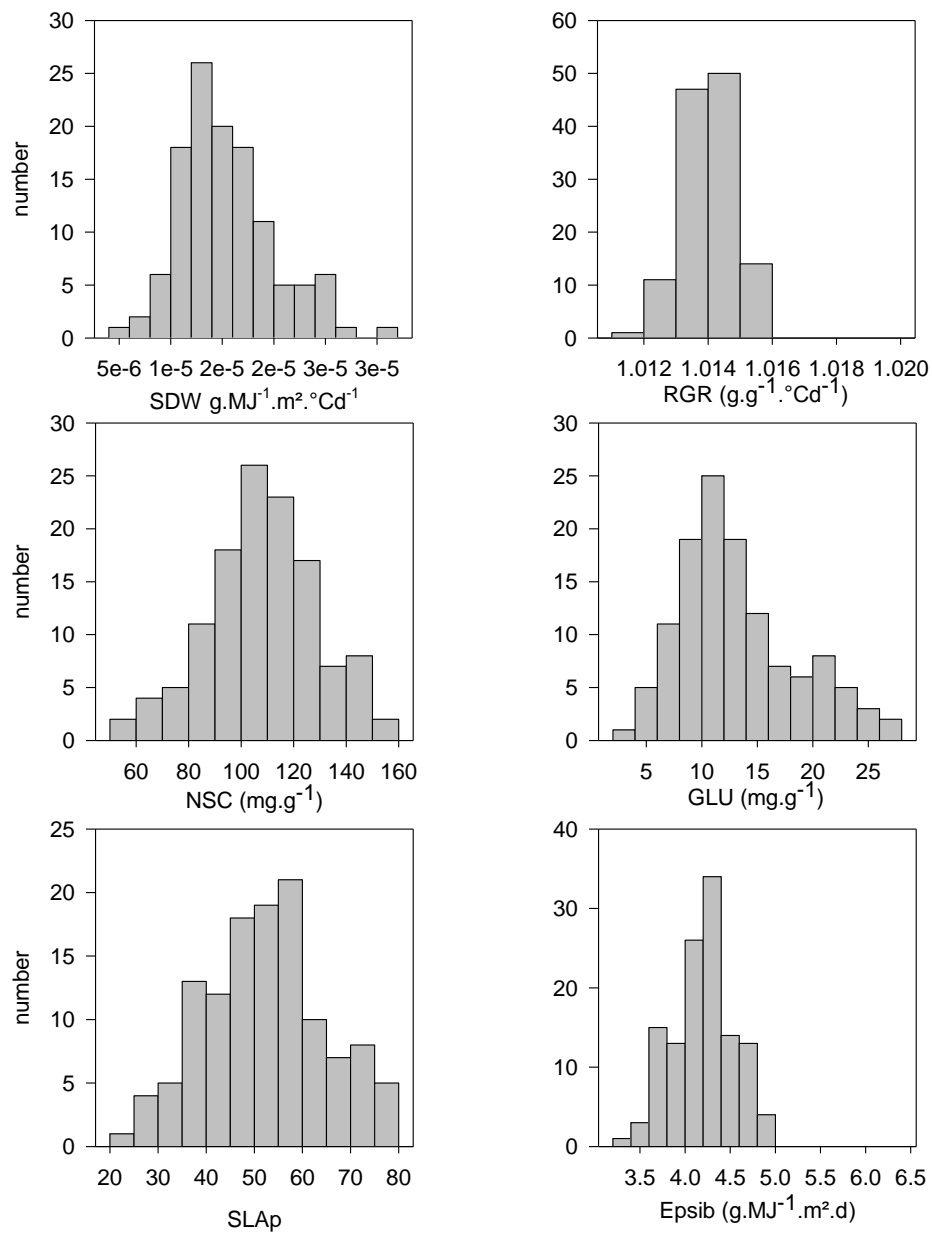

**Fig. S1 : Histogram of distribution of other morphological variables and model parameters used for GWAS. Acronyms are explained in Table 2 of the manuscript.**

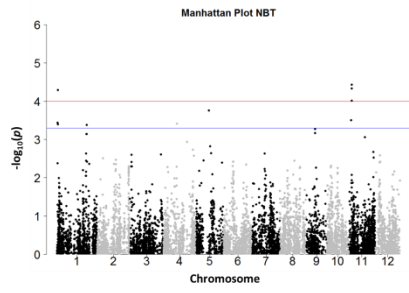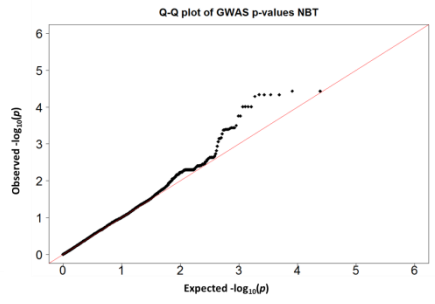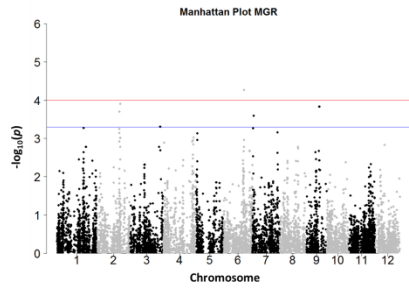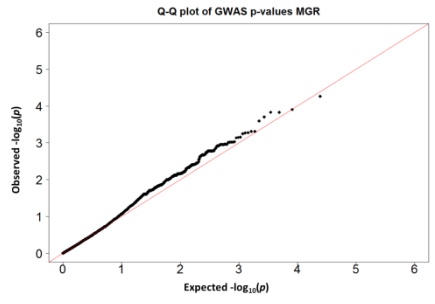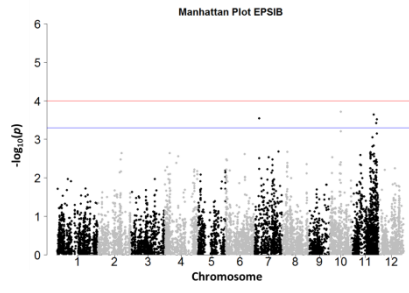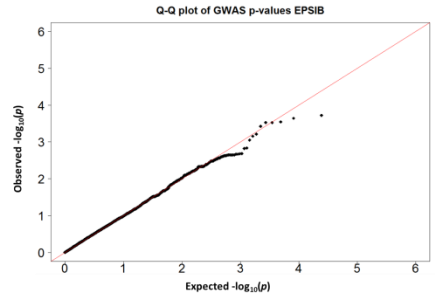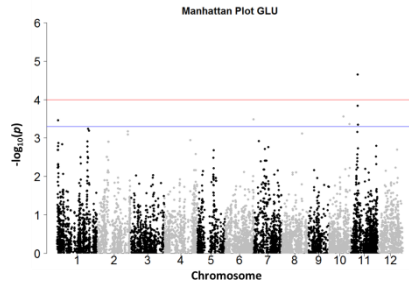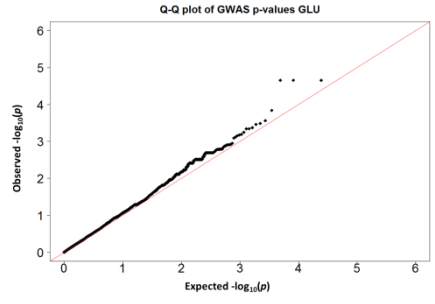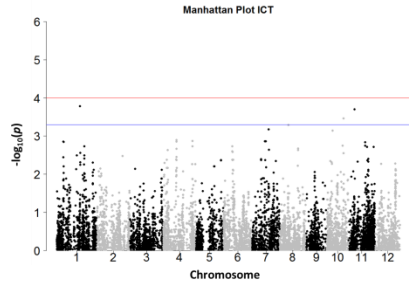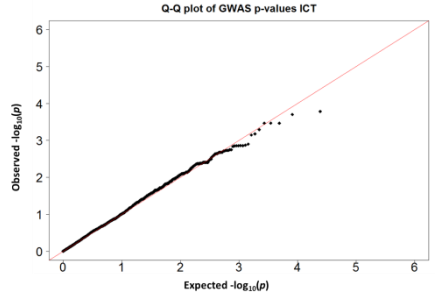



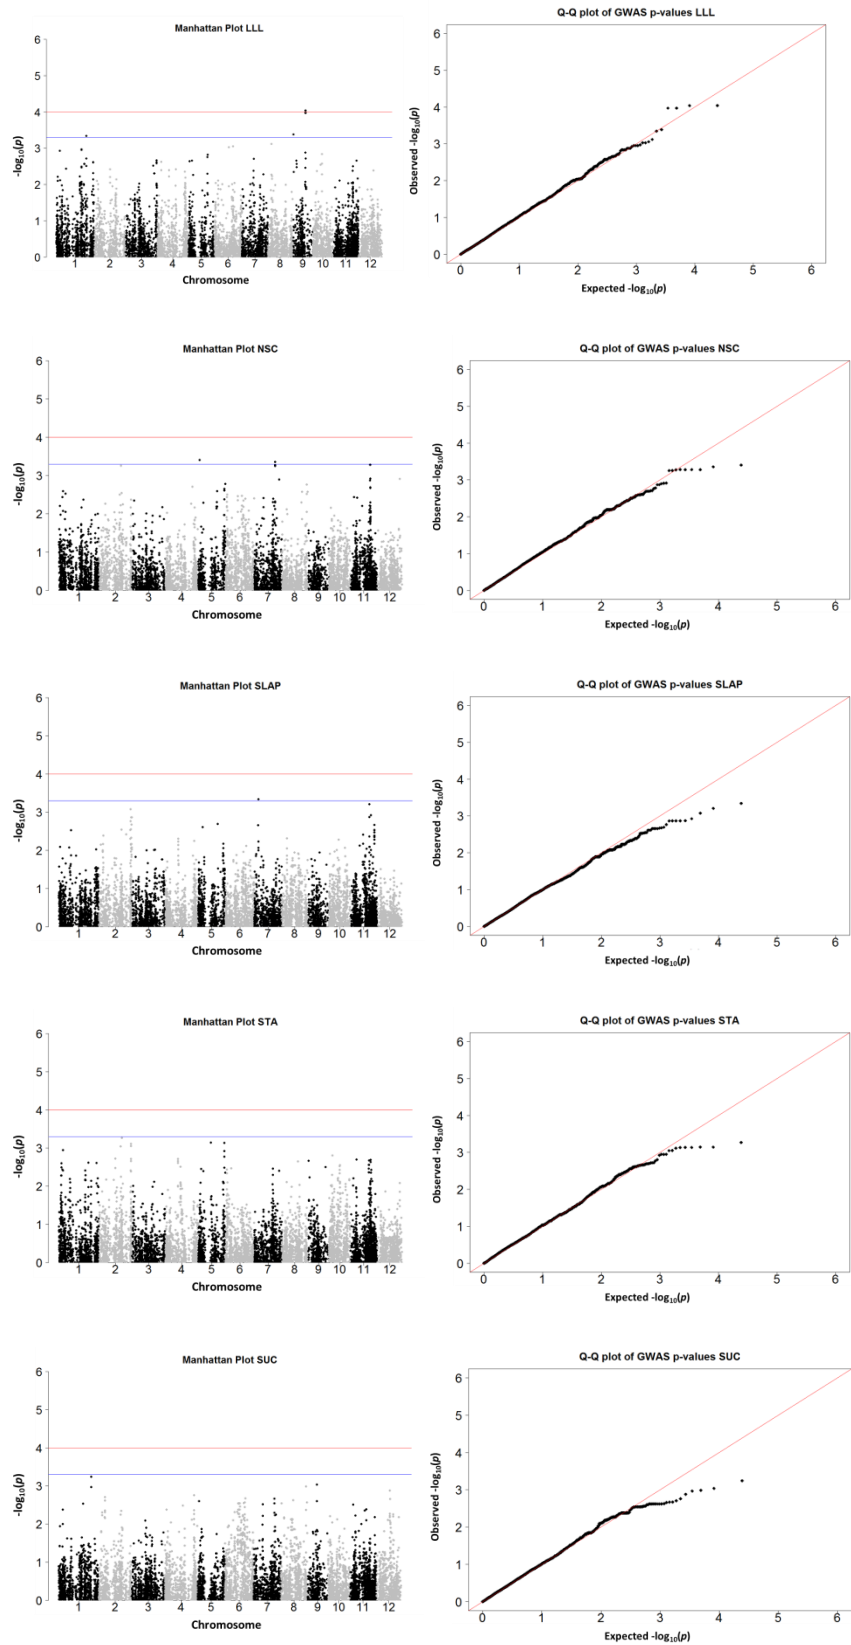

**Fig.S2 : Manhattan and Quantile – Quantile Plots for SUC, STA, SLAP, NSC, LLL, ICT, GLU, MGR, NBT and EPSIB. In the Manhattan plots the red line indicates the threshold for significant SNP association ( $P < 1.10^{-4}$ ) and the blue line indicates the threshold for suggestive SNP association ( $P < 5.10^{-4}$ ).**

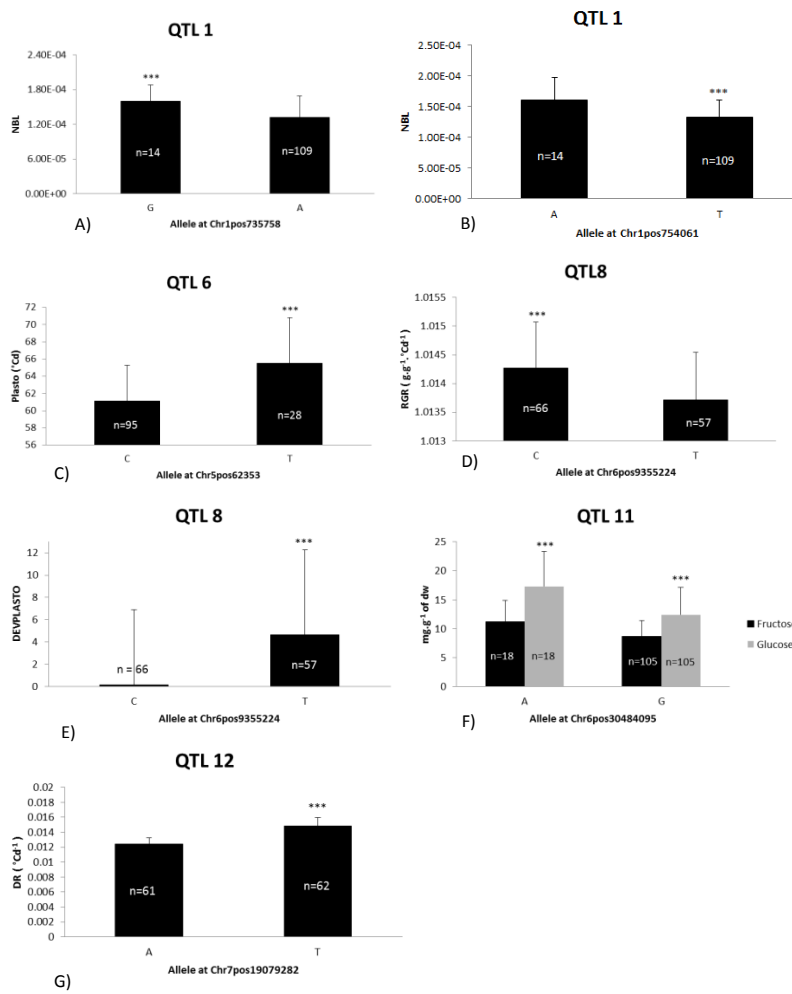

**Fig S3. Allele effects at markers associated with non-reported (A-C) and reported (D-G) genes. Phenotypic traits are described in Table 2 and QTL are described in Table 3.**
